# Supplementary material
Source: PubMed Central journal article supplement (PMC3484441)
Supplement: JCI62925sd.pdf [file JCI62925sd.pdf]

## SUPPLEMENTAL INFORMATION

### **Attenuated adenosine-to-inosine editing of microRNA-376a\* promotes invasiveness of glioblastoma cells**

Yukti Choudhury<sup>1</sup>, Felix Chang Tay<sup>2</sup>, Dang Hoang Lam<sup>1,2</sup>, Edwin Sandanaraj<sup>3</sup>, Carol Tang<sup>4</sup>, Beng-Ti Ang<sup>3,4</sup>, and Shu Wang<sup>1,2\*</sup>

<sup>1</sup>Institute of Bioengineering and Nanotechnology, Singapore

<sup>2</sup>Department of Biological Sciences, National University of Singapore, Singapore

<sup>3</sup>Singapore Institute for Clinical Sciences, Singapore

<sup>4</sup>Department of Neurosurgery and Neuro-Oncology Research Laboratory, National Neuroscience Institute, Singapore

#### **Index of Supplemental Information**

#### **SUPPLEMENTAL MATERIAL AND METHODS**

#### **SUPPLEMENTAL REFERENCES**

#### **SUPPLEMENTAL DATA**

Supplemental Figure 1

Supplemental Figure 2

Supplemental Figure 3

Supplemental Figure 4

Supplemental Table 1

Supplemental Figure 5

Supplemental Figure 6

Supplemental Figure 7

Supplemental Table 2

Supplemental Table 3

## **SUPPLEMENTAL MATERIAL AND METHODS**

### **RNA isolation**

Total RNA from cultured cells, cell pellets or tissue samples was prepared using TRIzol (Invitrogen). For frozen tumor samples, tissues were rapidly homogenized in appropriate volume of TRIzol using an ultrasonic processor (Vibra-Cell, Sonics & Materials). For xenograft tumors, tumor tissue in paraformaldehyde-fixed, OCT-embedded cryosections was separated from normal brain tissue and processed using FFPE RNA Isolation Kit (SA Bioscience) to remove paraformaldehyde cross-links and isolate RNA.

### **miRNA, siRNA duplexes, LNA, plasmids and transfection**

All miRNA duplexes corresponding to miR-376a\* were synthesized by Dharmacon. miRIDIAN microRNA Mimic Negative Control #2 from Dharmacon was used as control miRNA. Two siRNAs against AMFR (SI00022533 and SI00022540) and against RAP2A (SI00128989 and SI03040198) were purchased from Qiagen. Each siRNA targets a distinct region of target mRNA. siGENOME Non-Targeting siRNA #5 from Dharmacon was used as control siRNA. LNA against miR-376a\* and LNA-scr were purchased from Exiqon. Anti-miR miRNA inhibitor against miR-376a\* (4464084) and miRNA Inhibitor Negative Control #1 inhibitor were purchased from Ambion.

For stable expression of miRNAs, the Block-iT Pol II miR RNAi expression system (Invitrogen) was used to engineer pre-miRNA cassette to express only miR-376a\*. In the stem-loop design, only miR-376a\* guide strand is active and passenger strand does not correspond to miR-376a. Briefly, following manufacturer's protocol, the top strand of duplex encoded miR-376a\* with "A" or "G" at position 3 of the mature miRNA. The bottom strand sequence followed from the top strand as per protocol of Block-iT kit. The top and bottom strands were annealed and ligated to the linearized pcDNA™6.2-GW/EmGFP-miR vectors to generate pre-miR-376a\* plasmids.

For generation of stable U87 cell lines, pmiR-376a\*A or G plasmids were transfected using Lipofectamine 2000. Stable clones were selected over 2 weeks using 6 µg/ml blasticidin (Invitrogen). Four clones were selected and characterized for each construct.

For expression of ADARB1, pCMV-SPORT6-ADARB1 was purchased from Open Biosystem. pCMV-SPORT6-EGFP was constructed by inserting EGFP coding sequence between EcoRV and NotI sites of pCMV-SPORT6. The miR-376 cluster expression vector was constructed using the Block-iT Pol II miR RNAi system where the pcDNA™6.2-GW/EmGFP vector was first recircularized using a 20 bp linker sequence, and the genomic region corresponding miR-376 cluster was amplified from human genomic DNA and inserted between Sall and BglII sites using the following primers: 5'-ATGTCGACGAGAGTGATGGAAGGT-3' and 5'-ATAGATCTATACTGAGAACACAGCCTTG-3'.

For luciferase reporter assay, pMir-Report was purchased from Ambion. For construction of RAP2A and AMFR 3'UTR reporter plasmids, 3'UTR regions were amplified from human genomic DNA and

inserted into into SpeI and MluI sites for AMFR full length and AMFR-417, SacI and PmeI sites for RAP2A-2475 and HindIII and MluI site for RAP2A-1154.

For expression of RAP2A- and AMFR-ORF only, expression constructs were purchased from GeneCopoeia (EX-A0400-M68 for RAP2A and EX-T9295-M68 for AMFR). Full-length expression constructs including 3'UTR were purchased from Origene (SC113011 for RAP2A and SC119417 for AMFR). A control vector was generated by Not I digestion and recircularization of pCMV6-XL4-containing full-length RAP2A. Co-transfection of expression constructs (400 ng DNA) and miRNA duplexes (50 nM per well of 6-well plates) was done with Lipofectamine 2000.

miRNA mimics (Dharmacon) were transfected at concentration of 10 - 50 nM in glioma cells using Lipofectamine RNAiMax. Similarly, siRNAs (Dharmacon or Qiagen) were transfected at 1 - 10 nM concentration. Locked-nucleic acid (LNA) and Anti-miR miRNA inhibitor transfection was done at 50 nM using Lipofectamine RNAiMax.

### **Wound healing and invasion assay**

For wound healing assay, cells were cultured in 6-well plates, transfected and allowed to reach confluence. An artificial homogenous wound was made using a sterile p200 tip. For comparison of parental U87 cells and ELM-selected U87 cells,  $1 \times 10^5$  cells were seeded in 6-well plates and allowed to reach confluence before scratches were made as described. Cell debris was removed by washing cells with DPBS and medium was replaced with 1% FBS-containing DMEM. The wound borders were imaged just after wounding ( $t = 0$  h) and again after 24 or 36 hours to measure the wound gap distance. Wound coverage was determined as percentage of the gap width covered during incubation.

For in vitro invasion assay, the Boyden chamber assay with Matrigel-coated inserts with 8- $\mu$ m pores was used (BD Falcon). Three days after transfection with 10 nM miRNA, 2.5 nM siRNA, or with mixture of plasmid DNA and miRNA, glioma cells were starved overnight in unsupplemented OPTI-MEM (Invitrogen). On the day of the assay, cells were stained with Calcein-AM (Invitrogen), trypsinized and seeded onto the upper chamber ( $1 \times 10^5$  cells in 200  $\mu$ l of unsupplemented OPTI-MEM media). Lower chambers were filled with 700  $\mu$ l of supplemented OPTI-MEM (10% FBS). After 24 hours of incubation at 37°C, fluorescence readings of invaded cells at the bottom of inserts were measured with Victor3 1420 Multilabel Counter (Perkin Elmer) or number of labeled invading cells was manually counted from 4-5 imaged fields.

### **Cell viability, proliferation, and cell cycle assays**

Cell viability was measured in 96-well plates using the Cell-Titer Glo Assay (Promega). For growth rate assessment of stable U87 cells or parental and ELM-selected cells, 3000 cells were seeded per well of 96-well plates. Viability was measured from day 0 (day of seeding) until day 7.

Cell proliferation was quantified using the colorimetric BrdU cell proliferation assay (Roche). Briefly, at indicated times after transfection, cells were labeled with BrdU for 12 hrs. Labeled cells were fixed and

BrdU incorporation was measured as per the protocol using the anti-BrdU-peroxidase immunodetection. Absorbance of the colored product was measured at 370 nm (reference wavelength 492 nm) in a microplate reader (Bio-Rad).

For cell cycle analysis, cells treated as indicated were trypsinized and fixed in ice-cold 70% ethanol. Fixed cells were resuspended in PBS containing 0.1% Triton X-100, 20 µg/ml propidium iodide and 200 µg/ml RNase A and incubated in the dark for 30 minutes before analysis by flow cytometry (Beckman Coulter).

### **Luciferase reporter assay**

For luciferase reporter assay, HeLa cells in 96-well plates were transfected with 30 ng of reporter plasmid, 30 ng of CMV-β-galactosidase and 20 nM miRNA mimics using Lipofectamine 2000. After 48 hours, luciferase activity was measured using the Luciferase Assay system (Promega). Luciferase readings were normalized to β-galactosidase activity in the same lysate, quantified by the β-galactosidase Enzyme Assay System (Promega).

### **Immunohistochemistry**

Immunohistochemical detection was done on paraformaldehyde-fixed, OCT-embedded cryosections. Following heat-induced antigen retrieval in citrate buffer, sections were incubated with mouse anti-Ki-67 antibody (1:100 dilution, Dako) and rabbit anti-vWF antibody (prediluted, Abcam). Where fluorescent detection was done, Alex-Fluor 568 conjugated secondary antibodies (1:200 dilution, Molecular Probes) were used. For immunoperoxidase staining, biotin-conjugated secondary antibodies (1:200 dilution, BD Biosciences) were used in a three-step detection protocol (Millipore). DAB substrate was from BD Biosciences. Quantification of fluorescent Ki-67 signal was done using NIH ImageJ, by first converting images to 8-bit, subtracting background and adjusting threshold range to 17-255 (1). Signal intensities were enumerated from similar-size fields (5-6 fields for each tumor core or tumor edge) of different images and compared.

### **Western blotting and immunocytochemistry**

Protein lysates were prepared 72 hours after transfection using Cellytic M (Sigma) buffer. Protease inhibitor (Fermentas) was added to the lysis buffer at appropriate concentrations. Protein was quantified by DC protein assay (Bio-Rad). Twenty to forty micrograms of protein was separated on SDS-PAGE and transferred to nitrocellulose membrane using the iBlot system (Invitrogen). Membrane was blocked with 5% BSA and incubated overnight with rabbit anti-RAP2A (1:1000, GeneTex), rabbit anti-AMFR (1:5000, Novus Biologicals) and mouse anti-β-actin (1:2000, Abcam). Horseradish peroxidase (HRP)-conjugated anti-mouse secondary antibody (Abcam) was used at 1:2000 dilution and HRP-conjugated anti-rabbit secondary antibody (Amersham) was used at 1:5000 dilution. Chemiluminescent detection of protein was done using Amersham ECL Plus (GE Healthcare) and band intensities were quantified using ImageJ.

Immunostaining of actin cytoskeleton in methanol-acetone fixed cells was done using FITC-conjugated anti-actin antibody (1:500, Abcam).

### **Microarray and bioinformatics analyses**

Total RNA from U87 and SW1783 cell lines transfected as indicated was isolated using Trizol. For each cohort, three independent RNA samples were isolated. Following clean-up with Qiagen RNeasy column, amplification and labeling was done by Kreatech ULS labeling kit as per protocol. Fifteen  $\mu\text{g}$  of each labeled RNA sample was hybridized to Affymetrix Human Genome U133 Plus 2.0 arrays. CEL files were imported into GeneSpring GX 11 (Agilent) and signal intensities normalized using MAS5 algorithm and processed to remove 'absent' probesets and those in the lowest 20<sup>th</sup> percentile from analysis. Genes were filtered based on 1.5- or 2-fold change and  $P < 0.05$ , with respect to their respective control experiments. Enrichment of specific GO biological functions among the differentially expressed genes was evaluated by NCBI DAVID bioinformatics analysis (<http://david.abcc.ncifcrf.gov/>) using default settings. For miRNA binding site prediction, RNA 22 analysis (<http://cbcsrv.watson.ibm.com/rna22.html>) (2) was done on whole 3'UTR sequences and miR-376a\* sequence with "A" or "G".

### **Survival analysis in public glioma datasets**

We evaluated the survival association of mRNA expression for target genes in 2 independent public glioma patient datasets, REMBRANDT and "Gravendeel". The probesets were mapped to target genes by annotating the gene expression datasets with Affymetrix annotation (v32). The gene expression of patients was subdivided into two classes according to the expression level of individual genes. The patients who had gene expression values greater than and less than median expression of individual gene were classified as high-expression and low-expression groups, respectively. The survival time for the REMBRANDT dataset was scaled from months to years to provide a consistent representation across the 2 datasets. Kaplan-Meier survival curves were plotted for each subgroup of glioma patients. The difference among the survival curves was estimated using the generalized log-rank test. Results with log-rank test p-values of less than 0.05 were considered statistically significant. The probeset mapping and survival analysis (3) were performed using R software packages called *affy* and *survival*, respectively (<http://cran.rproject.org/web/packages/survival/index.html>).

### **Reverse-transcription PCR**

Real-time PCR quantification of mature miRNAs was done as described previously (4) except the sequence of the poly (T) adaptor used for cDNA synthesis was modified to 5'-CGATAGCGACGATACAGACTTGCTACTATAGG(T)12VN\*-3' and sequence of reverse primer was: 5'-CGATAGCGACGATACAGACTTG-3'. The forward primers corresponded to the full length mature miRNA sequence and were as follows:

miR-376a\*A: 5'- GTAGATTCTCCTTCTATGAGTAA

miR-376a\*G: 5'- GTGGATTCTCCTTCTATGAGTAAA  
miR-376a: 5'- ATCATAGAGGAAAATCCACGTAAA  
miR-376b: 5'- ATCATAGAGGAAAATCCATGTTAAA  
miR-376a2-5p: 5'- GTAGATTTTCCTTCTATGGTTAAA  
miR-376c: 5'-ACATAGAGGAAATCCACGTAAA  
miR-127: 5'- TCGGATCCGTCTGAGCTTGGCTAAA  
miR-154: 5'- TAGGTTATCCGTGTTGCCTTCGAAA  
miR-432: 5'- TCTTGGAGTAGGTCATTGGGTTGGAAA  
miR-654: 5'- TGGTGGGCCGCAGAACATGTGCAAA  
miR-16: 5'-TAGCAGCACGTAAATATTGGCGAAA  
miR-21: 5'-TAGCTTATCAGACTGATGTTGAAA  
miR-221: 5'-AGCTACATTGTCTGCTGGGTTTCAAA  
miR-106: 5'-AAAAGTGCTTACAGTGCAGGTAGAAA  
miR-10b: 5'-TACCCTGTAGAACCGAATTTGTGAAA

5S rRNA was used as an internal control. For comparison of miRNA expression in normal brain and tumor tissue, miR-16 was used for normalization (5). We determined that both A and G-containing primers were able to amplify miR-376a\* with similar efficiencies by real-time PCR using SYBR-Green PCR Mix (Applied Biosystems). For real-time PCR of mRNAs, total RNA was reverse transcribed using random hexamers by Superscript III RT-PCR kit (Invitrogen). Resulting cDNA was used for PCR using SYBR-Green PCR Mix. PCR and data collection was done on Bio-Rad iCycler Bio-Rad. Expression levels were normalized to 18S rRNA. RT-PCR for primary miRNAs was done using random hexamer cDNAs and primers used in primary miRNA editing analysis.

### Oligonucleotide Sequences

PCR and sequencing primers for primary miRNA editing analysis:

| Primary miRNA | Size (bp) | Forward                       | Reverse                   |
|---------------|-----------|-------------------------------|---------------------------|
| pri-miR-376a1 | 159       | 5'-acaggtgcacgcttcct-3'       | 5'-tccatggcgacttcacgt-3'  |
| pri-miR-376a2 | 159       | 5'-ggattgtacttaggttcgtgc-3'   | 5'-tggcttcagtcagccat-3'   |
| pri-miR-376b  | 166       | 5'-ccatgaactgtgtcagattg-3'    | 5'-ctacggctcttccagaaac-3' |
| pri-miR-376c  | 154       | 5'-gatagattgtgcttaggtcatgc-3' | 5'-gtccaggaatgttccaagc-3' |

Adapters and primers for cloning mature miR-376 cluster RNAs:

5' RNA adapter: 5' -CGACUGGAGCACGAGGACACUGACAUGGACUGAAGGAGUAGAAA -3'

RT adapter for small RNA cDNA library synthesis: 5'-ATTCTAGAGGCCGAGGCGGCCGACATG-d(T)30 VN-3'

FW primer: 5'-CTGACATGGACTGAAGGA-3'

miR-376c RV primer: 5'-TAAACGTGGAATTCCTC-3'

miR-376a1-5p RV primer: 5'- CAGCACTCATAGAAGGA -3'

miR-376a/b RV primer: 5'-TTTTWACRTGGATTTTCCTC-3' (R= A or G, W= A or T)

miR-376a2-5p RV primer: 5'- CACGTAACCATAGAAGG-3'

Oligonucleotide sequences for Block-iT pri-miR-376a\* and control miRNA expression plasmid:

pri-miR-376a\*A:

Top: 5'-TGCTGGTAGATTCTCCTTCTATGAGTAGTTTTGGCCACTGACTGACTACTCATAAGGAGAATCTAC-3'

Bottom:

5'-

CCTGGTAGATTCTCCTTATGAGTAGTCAGTCAGTGGCCAAAATACTCATAGAAGGAGAATCTACC-3'

pri-miR-376a\*G:

Top:

5'-TGCTGGTGGATTCTCCTTCTATGAGTAGTTTTGGCCACTGACTGACTACTCATAAGGAGAATCCAC-3'

Bottom:

5'-

CCTGGTGGATTCTCCTTATGAGTAGTCAGTCAGTGGCCAAAATACTCATAGAAGGAGAATCCACC-3'

cel-miR-239b:

Top:

5'TGCTGTTGTACTACACAAAAGTACTGGTTTTGGCCACTGACTGACCAGTACTTGTGTAGTACAA3'

Bottom:

5'CCTGTTGTACTACACAAGTACTGGTCAGTCAGTGGCCAAAACCAGTACTTTTGTGTAGTACAAC 3'

Primers for 3'UTR cloning:

| 3'UTR            | Size of PCR product (bp) | Forward                         | Reverse                         |
|------------------|--------------------------|---------------------------------|---------------------------------|
| RAP2A-2475       | 2475                     | agctGAGCTCCATCCAAAT<br>ATGGCT   | agtcGTTTAAACCACATTCATTT<br>GCCA |
| RAP2A-1154       | 1154                     | acgtACGCGTCATCCAAAT<br>ATGGCT   | tgcaAAGCTTGCTTTTGTCCCTT<br>AC   |
| RAP2A-426        | 426                      | tgacGAGCTCTGTTAGTGA<br>ATTGGT   | agtcGTTTAAACCACATTCATTT<br>GCCA |
| AMFR full length | 1411                     | tcgtACTAGTCGCTCCCTT<br>GCCTTCCT | atgcACGCGTTAGCTATGCTCTC<br>AGCA |
| AMFR-417         | 417                      | tgctACTAGTGTGTGAACC<br>TACCTGCC | atgcACGCGTTAGCTATGCTCTC<br>AGCA |

qRT-PCR primers for mRNAs:

Primer set for ADAR and ADARB1 were purchased from SA Biosciences.

| Gene           | Forward                | Reverse               |
|----------------|------------------------|-----------------------|
| RAP2A          | TTCCAGGTCCACTTTGTTCC   | AGCAGAGCTTCCAGGACATC  |
| AMFR           | TTCTACACAGCGGTCAGATAGC | GCCGAAGTCCAGCGTCTCC   |
| PDGFR $\alpha$ | CCACCGTCAAAGGAAAGAAG   | CCAATTTGATGGATGGGACT  |
| PDGFR $\beta$  | CAGGAGAGACAGCAACAGCA   | AACTGTGCCACACCAGAAG   |
| PDGF $\alpha$  | GATACCTCGCCCATGTTCTG   | CAGGCTGGTGTCCAAAGAAT  |
| PDGF $\beta$   | TCGAGTGGTCACTCAGCATC   | GCGCTCTTCCTGTCTCTCTG  |
| VEGFA          | AGCCTTGCCTTGCTGCTCTA   | GTGCTGGCCTTGGTGAGG    |
| TGF $\beta$ R1 | TTGTCTTTTGTACAGAGGTGGC | GCTGCTCCTCCTCGTGCT    |
| TGF $\beta$ R2 | GGAACTTGACTGCACCGTT    | CTGCACATCGTCTGTGG     |
| TGF $\alpha$   | GGGCAGTCATTAATGGGA     | GCTCTGGGTATTGTGTTGGC  |
| TGF $\beta$ 1  | CTTCCAGCCGAGGTCCTT     | CCCTGGACACCAACTATTGC  |
| TGF $\beta$ 2  | CTCCATTGCTGAGACGTCAA   | ATAGACATGCCGCCCTTCTT  |
| EGFR           | TCCTCTGGAGGCTGAGAAAA   | GGGCTCTGGAGGAAAAGAAA  |
| ANGPT1         | CCGACTTCATGTTTTCCACA   | ACCGGATTTCTCTTCCAGA   |
| ANGPTL2        | GGTAGATGGAGCTGGTGTGCG  | CACTATGCCACTCTCACCA   |
| ANGPTL4        | TAGTCCACTCTGCCTCTCCC   | GAGATGGCCCAGCCAGTT    |
| CXCL12         | TGGGCTCCTACTGTAAGGGTT  | TTGACCCGAAGCTAAAGTGG  |
| CXCR4          | TTTTCTTCACGGAAACAGGG   | GTTACCATGGAGGGGATCAG  |
| ITGB3          | TCATCAGAGCACCAGGCA     | TCTGGGCGACTGTGCTG     |
| FN1            | ACCTCGGTGTTGTAAGGTGG   | CCATAAAGGGCAACCAAGAG  |
| HIF1 $\alpha$  | TGGCTGCATCTCGAGACTTT   | GAAGACATCGCGGGGAC     |
| NTNG1          | GGGTACTCGCATCACTCA     | AAGTGAACTCGATCCTCCG   |
| TNXB           | TCTCAGCTTCATTTCCGTGA   | TCTACGGGAGCACAGTGGAC  |
| MMP2           | GGAAAGCCAGGATCCATTTT   | ATGCCGCCTTTAACTGGAG   |
| PLAU           | CCAGCTCACAATTCCAGTCA   | TGACCCACAGTGGAACACAG  |
| HGF            | CCCTGTAGCCTTCTCCTTGA   | CGCTGGGAGTACTGTGCAAT  |
| NRP2           | TGCTCCAGTCCACCTCGTAT   | AACTGCATGGAACCCATCTC  |
| 18S rRNA       | AACTTTCGATGGTAGTCGCCG  | CCTTGGATGTGGTAGCCGTTT |

## SUPPLEMENTAL REFERENCES

1. Feuer R, Pagarigan RR, Harkins S, Liu F, Hunziker IP, Whitton JL. Coxsackievirus targets proliferating neuronal progenitor cells in the neonatal CNS. *J Neurosci.* 2005;25(9):2434-2444.
2. Miranda KC, Huynh T, Tay Y, et al. A pattern-based method for the identification of MicroRNA binding sites and their corresponding heteroduplexes. *Cell.* 2006;126(6):1203-1217.
3. Harrington DP, Fleming TR. A class of rank test procedures for censored survival data. *Biometrika.* 1982;69:553-566.
4. Wu C, Lin J, Hong M, et al. Combinatorial control of suicide gene expression by tissue-specific promoter and microRNA regulation for cancer therapy. *Mol Ther.* 2009;17(12):2058-2066.
5. Gabriely G, Yi M, Narayan RS, et al. Human Glioma Growth Is Controlled by MicroRNA-10b. *Cancer Res.* 2011;71(10):3563-3572.



Figure S1

A

| miRNA     | Fold-change<br>in GBM | p-value  |
|-----------|-----------------------|----------|
| miR-376a* | 0.853                 | 2.49E-05 |
| miR-376a  | 0.517                 | 1.18E-09 |
| miR-376b  | 0.941                 | 0.0422   |
| miR-376c  | 0.789                 | 8.54E-05 |

B

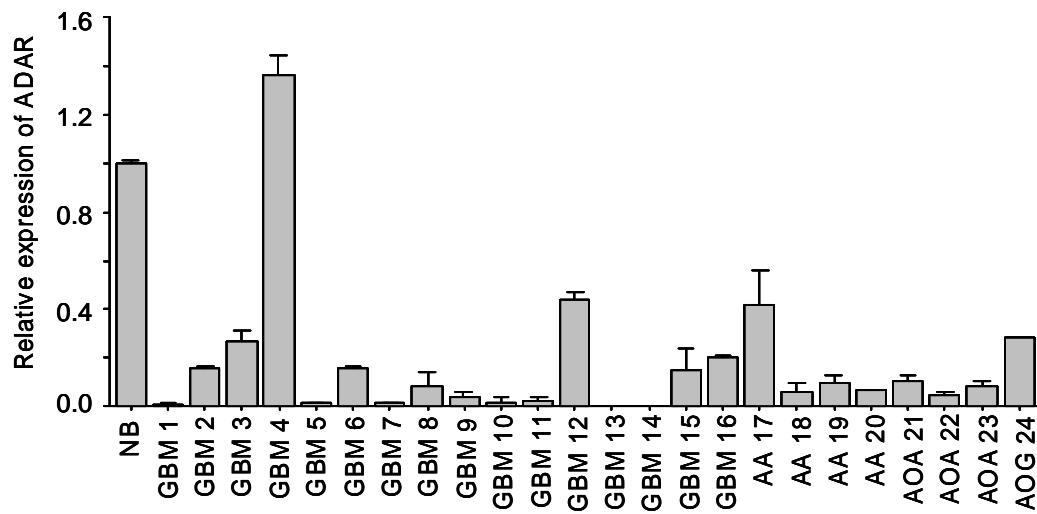

C

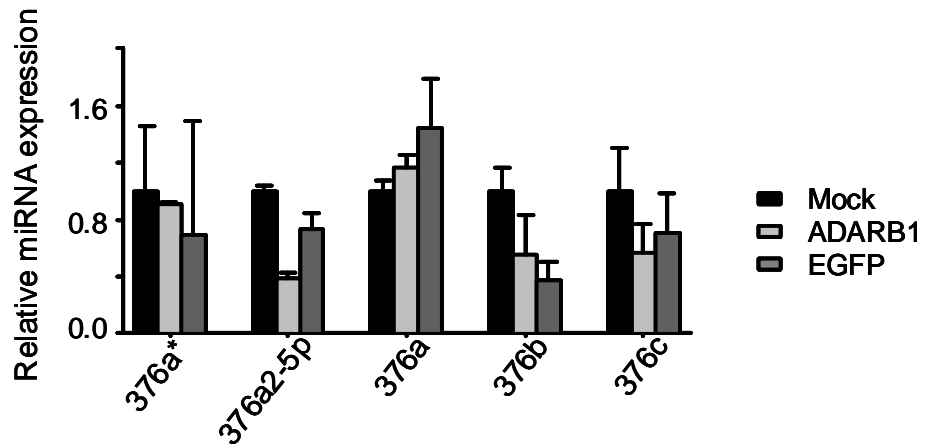

**Supplemental Figure 1. A-to-I editing of miR-376 cluster is reduced in glioma**

**(A)** Summary of data analysis of the Cancer Genome Atlas using Anduril framework for miRNA expression in GBMs. Samples used for the analysis include 251 GBMs. Fold-change is relative to miRNA expression in 10 normal brain samples. P-values associated to fold change are obtained from the same analysis.

**(B)** Relative expression levels of editing enzyme *ADAR* mRNA by qRT-PCR in normal brain (NB) and tumor samples (n = 3). All values were normalized to 18S rRNA levels in the same sample.

**(C)** Relative expression by qRT-PCR of endogenous mature miR-376a\*, miR-376a2-5p, miR-376a, miR-376b and miR-376c in U87 cells transfected with ADARB1 or EGFP expression plasmids (n = 3).

Error bars indicate SD.

Figure S2

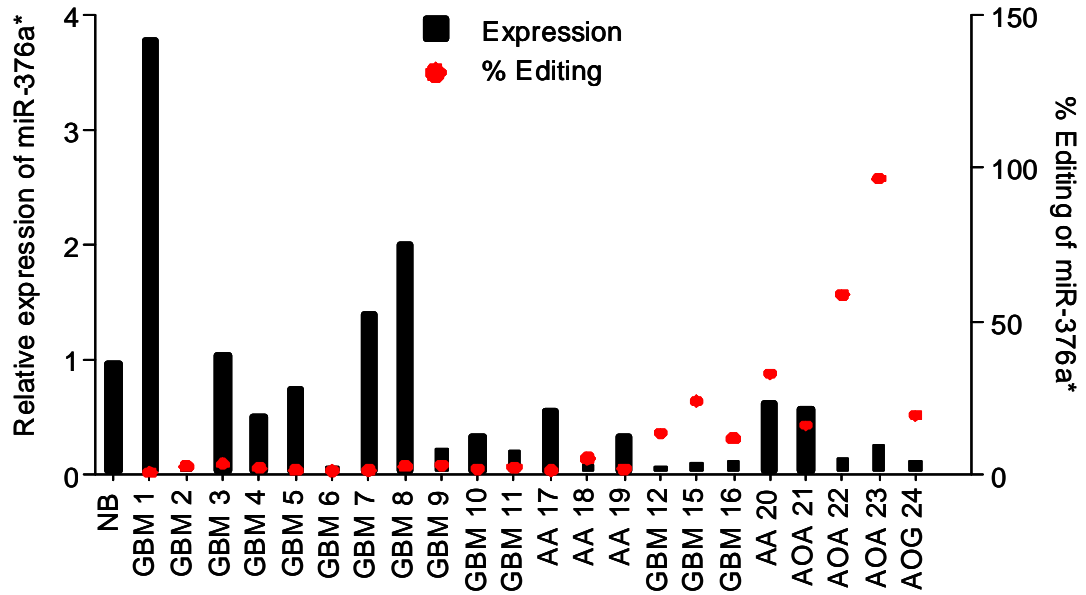

**Supplemental Figure 2. Accumulation of unedited miR-376a\* correlates with glioma invasion.**

Expression of total miR-376a\* in tumor samples measured by qRT-PCR. Values were normalized to miR-16 (n = 3). % Editing of miR-376a\* in the same sample is also indicated.

Figure S3

A

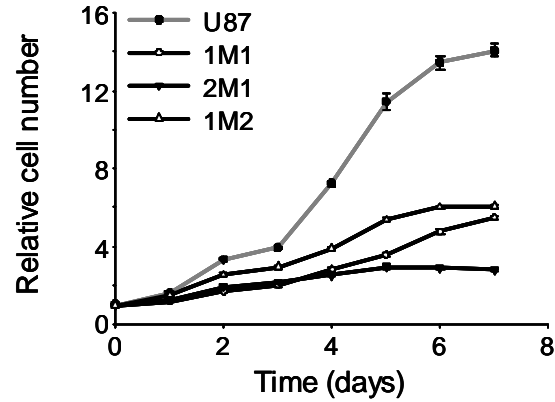

B

| Cell line | Frequency of Editing (%) |      |      |               |       |       |              |              |       |
|-----------|--------------------------|------|------|---------------|-------|-------|--------------|--------------|-------|
|           | pri-miR-376a1            |      |      | pri-miR-376a2 |       |       | pri-miR-376b | pri-miR-376c |       |
|           | site +5                  | +9 ‡ | +44  | +11           | +15   | +55   | +67          | +4           | +48   |
| U87       | 1.61                     | 3.6  | 4.69 | 11.23         | 14.62 | 75.74 | 52.61        | 0.96         | 42.69 |
| 1M1       | 1.68                     | 5.82 | 5.02 | 20.5          | 19.82 | 78.55 | 61.72        | 1.02         | 42.78 |
| 1M2       | 2.11                     | 3.89 | 7.02 | 14.91         | 13.89 | 69    | 55.75        | 3.95         | 30.69 |
| 2M1       | 2.28                     | 2.85 | 7.31 | 10.54         | 15.93 | 74.66 | 56.14        | 1.7          | 36.73 |

**Supplemental Figure 3. Editing and expression of miR-376 cluster in invasive glioma cells**

**(A)** In vitro growth curves for parental U87 and ELM-selected cells. For each cohort, number of cells in five wells was counted for 7 days as indicated and plotted relative to cell number on day 0. Data represents mean  $\pm$  SD.

**(B)** Quantification of editing frequencies for miR-376 cluster editing sites in U87 and ELM cells by direct sequencing of RT-PCR products of primary miRNAs (pri-miRs). For each pri-miR, the 5' end of stem-loop sequence annotated in the Sanger miRBase site is counted as +1. Editing frequency is calculated as the % ratio of G peak over the sum of A and G peaks for the editing site.

Figure S4

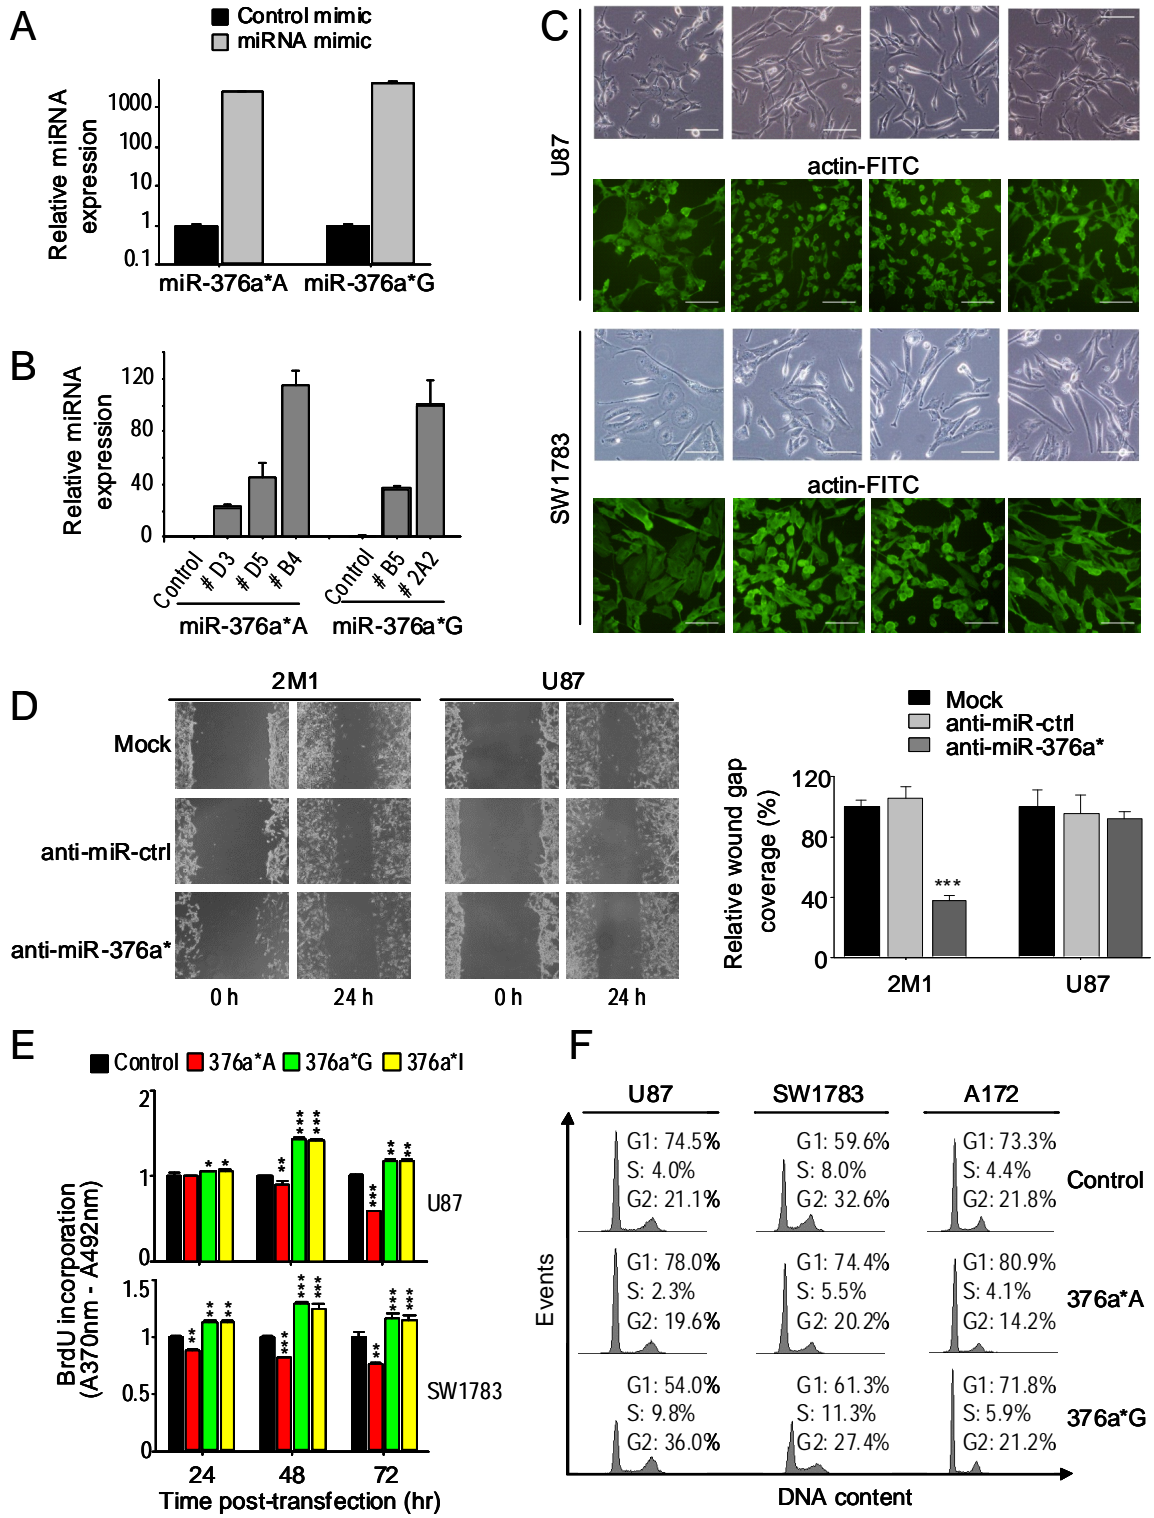

**Supplemental Figure 4. Unedited miR-376a\* promotes glioma cell invasion in vitro**

**(A)** Expression of miR-376a\*A or miR-376a\*G in U87 cells transiently transfected with 10 nM miRNA mimics. Measurement was done by qRT-PCR using forward primers corresponding to A- or G- version of miR-376a\* (n = 3). Values were normalized to 5S rRNA levels in the same sample.

**(B)** Expression of miR-376a\*A in stably transfected U87 cell lines D3, D5, and B4, and miR-376a\*G expression in stably transfected U87 cell lines B5 and 2A2 (n = 3). Values were normalized to 5S rRNA levels in the same sample.

**(C)** Morphology of U87 and SW1783 glioma cells transiently transfected with miR-376a\*A/G/I or control miRNA. Actin-FITC labeling highlights the organized actin cytoskeleton in miR-376a\*A transfected cells. Loss of cytoskeletal organization can be observed in both miR-376a\*G and miR-376a\*I transfected cells. Scale bar = 60  $\mu$ m.

**(D)** Wound healing migration assay of U87 cells and ELM-selected 2M1 cells after anti-miRNA inhibitor-mediated knockdown of miR-376a\*A. anti-miR-ctrl : miRNA against control (n = 3).

**(E)** Measurement of relative proliferation rates of transiently transfected U87 and SW1783 cells, using the BrdU incorporation assay. BrdU incorporation was measured at indicated time-points after transfection and five wells were used for each group.

**(F)** Flow cytometry to assess cell cycle distribution of transfected U87, A172 and SW1783 glioma cells. While miR-376a\*A causes an increase in cells in G1 phase, miR-376a\*G results in an increase in cells in S- and G2/M-phases. Percentage of cells in each phase was quantified by using CellQuest software (Becton Dickinson) and is shown as mean. Representative traces from 3 different experiments are shown. Error bars indicate SD. \*p < 0.05, \*\*p < 0.01, \*\*\*p < 0.001 by t test.

**Supplemental Table 1. Summary of DAVID functional enrichment analysis for differentially expressed genes in miR-376a\*-transfected U87 cells, identified by Affymetrix microarray**

| <b>Annotated Biological Process†</b>             | <b>Enrichment Score</b> | <b>p-value</b> | <b>FDR</b> | <b>Gene Count</b> | <b>%</b> |
|--------------------------------------------------|-------------------------|----------------|------------|-------------------|----------|
| <b>Genes up-regulated by miR-376a*A</b>          |                         |                |            |                   |          |
| GO:0007275~multicellular organismal development  | 15.20                   | 3.8E-21        | 6.9E-18    | 199               | 29.3     |
| GO:0001944~vasculature development               | 8.50                    | 6.3E-11        | 1.1E-07    | 35                | 5.2      |
| GO:0007155~cell adhesion                         | 8.17                    | 2.0E-11        | 3.6E-08    | 65                | 9.6      |
| GO:0001501~skeletal system development           | 6.44                    | 2.9E-09        | 5.3E-06    | 37                | 5.4      |
| GO:0030154~cell differentiation                  | 5.82                    | 2.8E-12        | 5.0E-09    | 117               | 17.2     |
| GO:0006928~cell motion                           | 5.29                    | 4.9E-07        | 8.8E-04    | 42                | 6.2      |
| GO:0009605~response to external stimulus         | 4.81                    | 9.5E-10        | 1.7E-06    | 73                | 10.8     |
| <b>Genes down-regulated by miR-376a*A</b>        |                         |                |            |                   |          |
| GO:0022403~cell cycle phase                      | 4.06                    | 1.5E-06        | 2.7E-03    | 42                | 4.7      |
| GO:0044248~cellular catabolic process            | 2.22                    | 3.8E-04        | 6.7E-01    | 70                | 7.9      |
| <b>Genes up-regulated by miR-376a*G</b>          |                         |                |            |                   |          |
| GO:0007049~cell cycle                            | 35.13                   | 1.6E-47        | 2.8E-44    | 166               | 13.7     |
| GO:0006259~DNA metabolic process                 | 10.54                   | 2.1E-28        | 3.8E-25    | 105               | 8.7      |
| GO:0000226~microtubule cytoskeleton organization | 8.64                    | 1.8E-11        | 3.2E-08    | 35                | 2.9      |
| GO:0051726~regulation of cell cycle              | 7.81                    | 9.5E-16        | 1.8E-12    | 64                | 5.3      |
| GO:0007059~chromosome segregation                | 7.68                    | 2.9E-17        | 5.2E-14    | 32                | 2.6      |
| <b>Genes down-regulated by miR-376a*G</b>        |                         |                |            |                   |          |
| GO:0001944~vasculature development               | 6.59                    | 4.4E-09        | 7.9E-06    | 44                | 3.6      |
| GO:0009653~anatomical structure morphogenesis    | 4.47                    | 1.6E-07        | 2.9E-04    | 124               | 10.1     |
| GO:0009966~regulation of signal transduction     | 4.15                    | 8.9E-07        | 1.6E-03    | 95                | 7.8      |
| GO:0030154~cell differentiation                  | 2.73                    | 5.2E-05        | 9.4E-02    | 146               | 11.9     |
| GO:0016477~cell migration                        | 2.37                    | 5.2E-04        | 9.5E-01    | 34                | 2.8      |

† List of transcripts that had were up- or down-regulated >2-fold, P value <0.05, 72 hours after treatment with miR-376a\*A or miR-376a\*G relative to control miRNA were analyzed for enrichment of GO biological processes using DAVID Bioinformatics Resources. The most significantly enriched GO Biological Process annotation terms in the gene lists, are presented with enrichment score, p-value, false discovery rate, the number and % of total genes falling in each annotation cluster. p-value of enrichment modified Fisher's exact test.

Figure S5

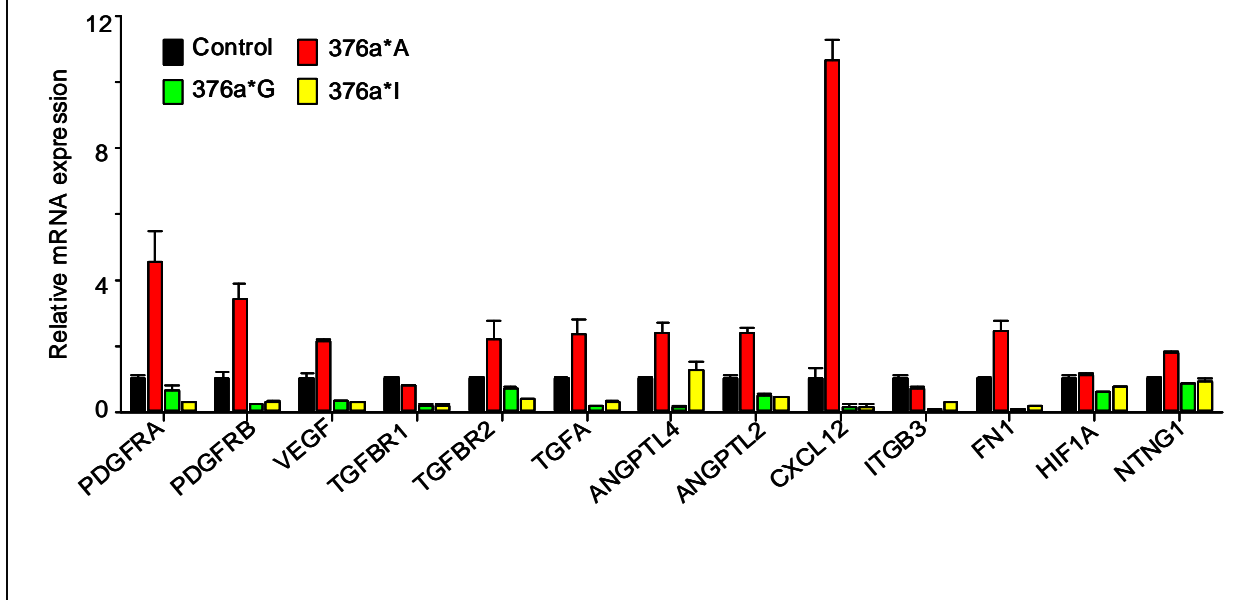

**Supplemental Figure 5. Expression of invasion-related genes is similarly modulated by miR-376a\*G and miR-376a\*I.**

Expression verification by qRT-PCR of genes involved in glioma migration, invasion and angiogenesis in U87 cells transfected with miR-376a\*A/G/I (n = 3). Expression was normalized to 18S rRNA.



Figure S6

A

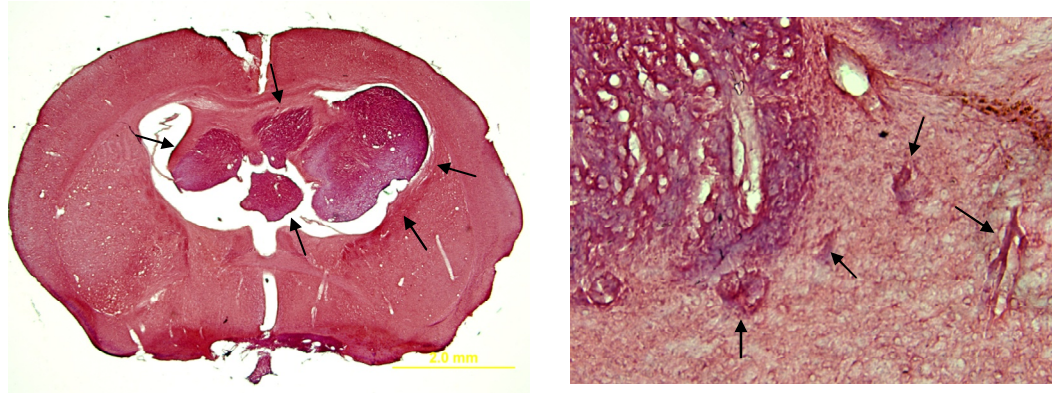

B

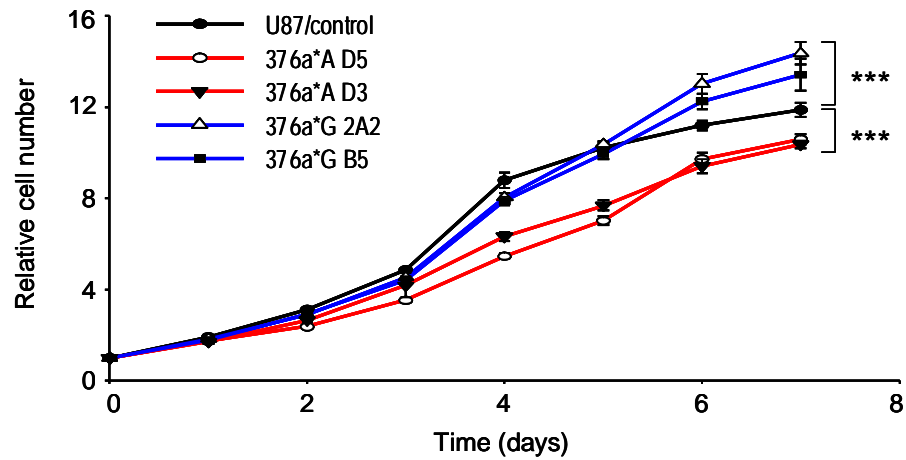

**Supplemental Figure 6. Unedited miR-376a\* promotes glioma cell invasion in vivo**

**(A)** H&E staining of tumor sections from the B4 clone of U87 cell line stably transfected with miR-376a\*A. *Left:* H&E staining showing the formation of disseminated tumors after intrastratum injection of B4 cells. Arrows indicate tumor foci; *Right:* H&E staining showing irregular tumor boundary at higher magnification and tumor satellites (arrows). Scale bar: 200  $\mu$ m.

**(B)** In vitro growth curves of U87 cells stably transfected with miR-376a\*A (red curves), miR-376a\*G (blue) or control miRNA (black). For each cohort, number of cells in five wells was counted for 7 days as indicated and plotted relative to cell number on day 0.

Error bars indicate SD. \*\*\*p < 0.001 by t test.

Figure S7

A

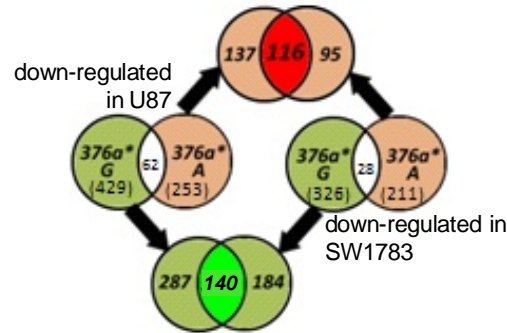

B

|                       |                          |                             |
|-----------------------|--------------------------|-----------------------------|
| miR-376a*A 3'→5'      | AUG--AGUAUCUUCUCUUAGAUG  | AU---GAGUAUCUUCUCUUAGAUG    |
|                       | : : : :                  | :                           |
| <i>H. sapiens</i>     | GGCTGTCCTGGAT--GGGATTTGC | TCAGTCTCCTTTAT---GCATCTGC   |
| <i>P. troglodytes</i> | GGCTGTCCTGGAT--GGGATTTGC | TCAGTCTCCTTTAT---GCATCTGC   |
| <i>M. mulatta</i>     | GGCTGTCCTGGAT--GGGATTTGC | TCAGTCTCCTTTAT---GCATCTGC   |
| <i>B. taurus</i>      | GGCTGTCCTGGAT--GGGATTTGC | TCAGTCcCCTccAT---GCACCTGC   |
| <i>M. musculus</i>    | GGCTGTCCTGGAT--GGGATTTGC | TCAGTCcttcta-----CATCTGC    |
| RAP2A 3'UTR 5'→3'     | nt 12-33                 | nt 203-224                  |
| miR-376a*A 3'→5'      | AUGAGUAUCUUCUCUUAGAUG    | AUGAGUAUCUU-CC---UCUUAGAUG  |
|                       | : : : :                  | : :                         |
| <i>H. sapiens</i>     | AAGGCATAGTCCATCGATCTAC   | -----ATAGTCTGGCTTTAGAATTTGT |
| <i>P. troglodytes</i> | AAGGCATAGTCCATCGATCTAC   | -----ATAGTCTGGCTTTAGAATTTGT |
| <i>M. mulatta</i>     | AAGGCATAGTCCATCGATCTAC   | -----ATAGTCTGGCTTTAGAATTTGT |
| <i>B. taurus</i>      | AAGGCATAGTCCATCGATCTAC   | -----AcAGcCTGatgTTAGAA--TGT |
| <i>M. musculus</i>    | AAGGCATAGTCCATCGATCTAC   | -----ccAGtCTGGCTTTAGAATcTGT |
| RAP2A 3'UTR 5'→3'     | nt 231-252               | nt 660-681                  |
| miR-376a*A 3'→5'      | AUGAGUAUCUUC-UCUUAGAUG   | A--UGAGUAU-CUUCUCUUAGAUG    |
|                       | : : :      : :           | :       : :                 |
| <i>H. sapiens</i>     | -GCTTTCAAAATCAAGTATTTGC  | ATAAC-CATGTGAAAT--AATTTGG   |
| <i>P. troglodytes</i> | -GCTTTCAAAATCAAGTATTTGC  | ATAAC-CATGTGAAAT--AATTTGG   |
| <i>M. mulatta</i>     | -GCTTTCAAAATCAAGT--TTGC  | ATAAC-CATGTGAAAT--AATTTGG   |
| <i>B. taurus</i>      | -GCTTTCAAAATCAAGT--TTtC  | ATAAC-CATGTGAAAT--AA-TTGG   |
| <i>M. musculus</i>    | -GCTTTCAAAATCAAGT--TTtC  | ATAAC-CATGTGAAAT--AA-TTGG   |
| RAP2A 3'UTR 5'→3'     | nt 1026-1047             | nt 1085-1106                |

C

|                       |                          |                             |
|-----------------------|--------------------------|-----------------------------|
| miR-376a*G 3'→5'      | AU--GAGUAUCUUCUCUUAGGUG  | AUGAGUAUCUUC---UCU---UAGGUG |
|                       |                          |                             |
| <i>H. sapiens</i>     | AGTCCTTTTGGGA--AGAATCCAG | -----GGAAGAATCCAGTATTATCCAC |
| <i>P. troglodytes</i> | AGTCCTTTTGGGA--AGAATCCAG | -----GGAAGAATCCAGTATTATCtAC |
| <i>M. mulatta</i>     | AGTCCTTTTGGGA--AGAATCCAG | -----GGAAGAATCCAGTATTATCtAC |
| <i>C. familiaris</i>  | AGTCCTTTTGGGA--AGAATCCAG | -----GGAAGAATCCAGTATTATCtAa |
| <i>M. musculus</i>    | AGTCCTTTTGGGA--AaAATCCAG | -----GGAAAAATCCAGTATTATCtAa |
| AMFR 3'UTR 5'→3'      | nt 1183-1204             | nt 1192-1214                |

**Supplemental Figure 7. Distinct target gene specificities of unedited and edited miR-376a\***

**(A)** Schematic diagram for identification of target genes that are uniquely regulated by either miR-376a\*A or miR-376a\*G. Numbers of transcripts down-regulated in response to overexpression of miR-376a\*A or 376a\*G in U87 and SW1783 cells are included. Numbers of transcripts exclusively down-regulated by miR-376a\*A in both cell lines are presented in the area shaded red and those corresponding to miR-376a\*G in the area shaded green. These represent candidate target genes for each miRNA.

**(B)** Alignment of potential miR-376a\*A-binding sites in *RAP2A* 3'UTRs of different species indicating evolutionary conservation.

**(C)** Alignment of potential miR-376a\*G-binding sites in *AMFR* 3'UTRs of different species indicating evolutionary conservation.

**Supplemental Table 2. Genes downregulated by miR-376a\*A in U87 and SW1783 cells\***

| Symbol       | Description                                                                                       | Fold-change in U87 | Fold-change in SW1783 |
|--------------|---------------------------------------------------------------------------------------------------|--------------------|-----------------------|
| SEPT10       | septin 10                                                                                         | 2.38               | 2.04                  |
| ADAM17       | ADAM metallopeptidase domain 17                                                                   | 1.77               | 1.64                  |
| ALG2         | asparagine-linked glycosylation 2, alpha-1,3-mannosyltransferase homolog ( <i>S. cerevisiae</i> ) | 2.37               | 1.91                  |
| ARL6         | ADP-ribosylation factor-like 6                                                                    | 3.32               | 2.72                  |
| ARMCX5       | armadillo repeat containing, X-linked 5                                                           | 4.70               | 2.63                  |
| ATP10D       | ATPase, class V, type 10D                                                                         | 1.92               | 1.81                  |
| B3GAT3       | beta-1,3-glucuronyltransferase 3 (glucuronosyltransferase I)                                      | 2.09               | 2.04                  |
| BAG5         | BCL2-associated athanogene 5                                                                      | 1.72               | 1.66                  |
| BRI3BP       | BRI3 binding protein                                                                              | 4.32               | 3.28                  |
| BZW1         | basic leucine zipper and W2 domains 1                                                             | 3.24               | 3.27                  |
| C18orf54     | chromosome 18 open reading frame 54                                                               | 2.42               | 2.29                  |
| C18orf55     | chromosome 18 open reading frame 55                                                               | 2.43               | 2.09                  |
| C7orf58      | chromosome 7 open reading frame 58                                                                | 2.02               | 2.00                  |
| CAST         | calpastatin                                                                                       | 1.76               | 1.60                  |
| COMMD2       | COMM domain containing 2                                                                          | 6.03               | 4.08                  |
| DENR         | density-regulated protein                                                                         | 1.67               | 1.77                  |
| DIP2A        | DIP2 disco-interacting protein 2 homolog A ( <i>Drosophila</i> )                                  | 2.13               | 2.03                  |
| DKFZP564C152 | DKFZP564C152 protein                                                                              |                    |                       |
| DPYD         | dihydropyrimidine dehydrogenase                                                                   | 2.68               | 1.91                  |
| ELOVL5       | ELOVL family member 5, elongation of long chain fatty acids (FEN1/Elo2, SUR4/Elo3-like, yeast)    | 4.80               | 2.30                  |
| EPB41L5      | erythrocyte membrane protein band 4.1 like 5                                                      | 1.58               | 1.65                  |
| ERLIN2       | ER lipid raft associated 2                                                                        | 2.80               | 1.93                  |
| FAM168A      | family with sequence similarity 168, member A                                                     | 2.56               | 1.98                  |
| FAM18B       | family with sequence similarity 18, member B                                                      | 4.79               | 4.45                  |
| FAM20B       | family with sequence similarity 20, member B                                                      | 1.67               | 1.60                  |
| FAM55C       | family with sequence similarity 55, member C                                                      | 3.16               | 2.38                  |
| FGF2         | fibroblast growth factor 2 (basic)                                                                | 2.63               | 3.52                  |
| FRMD5        | FERM domain containing 5                                                                          | 1.74               | 1.77                  |
| G3BP2        | GTPase activating protein (SH3 domain) binding protein 2                                          | 3.11               | 2.07                  |
| GALNT11      | UDP-N-acetyl-alpha-D-galactosamine:polypeptide N-acetylgalactosaminyltransferase 11 (GalNAc-T11)  | 2.03               | 1.57                  |
| GFPT1        | glutamine-fructose-6-phosphate transaminase 1                                                     | 2.82               | 2.09                  |
| GIGYF2       | GRB10 interacting GYF protein 2                                                                   | 1.97               | 1.62                  |
| GLT8D3       | glycosyltransferase 8 domain containing 3                                                         | 1.70               | 1.96                  |
| GNE          | glucosamine (UDP-N-acetyl)-2-epimerase/N-acetylmannosamine kinase                                 | 2.03               | 1.94                  |
| GOLPH3L      | golgi phosphoprotein 3-like                                                                       | 1.88               | 1.71                  |
| HDAC9        | histone deacetylase 9                                                                             | 2.34               | 1.87                  |
| HNRNPAB      | heterogeneous nuclear ribonucleoprotein A/B                                                       | 2.05               | 1.73                  |
| ISOC1        | isochorismatase domain containing 1                                                               | 2.77               | 2.31                  |
| KCTD12       | potassium channel tetramerisation domain containing 12                                            | 2.69               | 2.65                  |
| KDSR         | 3-ketodihydrospingosine reductase                                                                 | 4.52               | 2.88                  |
| KIF16B       | kinesin family member 16B                                                                         | 2.85               | 2.99                  |
| KPNA6        | karyopherin alpha 6 (importin alpha 7)                                                            | 1.99               | 1.86                  |
| LARS2        | leucyl-tRNA synthetase 2, mitochondrial                                                           | 1.67               | 1.70                  |
| LOC643287    | similar to prothymosin alpha                                                                      | 2.54               | 2.70                  |
| LOC727914    | BMS1-like, ribosome assembly protein (yeast) pseudogene                                           | 3.14               | 2.05                  |
| LRRFIP2      | leucine rich repeat (in FLII) interacting protein 2                                               | 1.52               | 1.66                  |
| LYRM7        | Lym7 homolog (mouse)                                                                              | 1.72               | 1.57                  |
| MAP2         | microtubule-associated protein 2                                                                  | 1.57               | 1.75                  |
| MDH1         | malate dehydrogenase 1, NAD (soluble)                                                             | 2.41               | 1.91                  |
| MED28        | Mediator complex subunit 28                                                                       | 4.09               | 2.00                  |
| MELK         | maternal embryonic leucine zipper kinase                                                          | 3.14               | 2.79                  |
| MIS12        | MIS12, MIND kinetochore complex component, homolog (yeast)                                        | 2.05               | 1.98                  |
| MLF1IP       | MLF1 interacting protein                                                                          | 2.97               | 1.81                  |
| MUS81        | MUS81 endonuclease homolog ( <i>S. cerevisiae</i> )                                               | 1.61               | 1.54                  |
| MYH9         | myosin, heavy chain 9, non-muscle                                                                 | 1.97               | 1.68                  |
| NAPG         | N-ethylmaleimide-sensitive factor attachment protein, gamma                                       | 3.49               | 2.98                  |
| NHLRC3       | NHL repeat containing 3                                                                           | 2.84               | 1.99                  |
| NSUN2        | NOL1/NOP2/Sun domain family, member 2                                                             | 2.47               | 2.32                  |
| NUDT15       | nudix (nucleoside diphosphate linked moiety X)-type motif 15                                      | 2.55               | 2.30                  |

|               |                                                                                  |             |             |
|---------------|----------------------------------------------------------------------------------|-------------|-------------|
| NUP50         | nucleoporin 50kDa                                                                | 2.45        | 1.77        |
| ORAI3         | ORAI calcium release-activated calcium modulator 3                               | 2.23        | 2.11        |
| PANK4         | pantothenate kinase 4                                                            | 1.85        | 1.82        |
| PEX19         | peroxisomal biogenesis factor 19                                                 | 5.12        | 3.34        |
| PIP4K2A       | phosphatidylinositol-5-phosphate 4-kinase, type II, alpha                        | 2.59        | 2.07        |
| PITRM1        | pitrilysin metalloproteinase 1                                                   | 3.48        | 3.14        |
| POMGNT1       | protein O-linked mannose beta1,2-N-acetylglucosaminyltransferase                 | 2.38        | 2.27        |
| PPP2R2A       | protein phosphatase 2 (formerly 2A), regulatory subunit B, alpha isoform         | 1.51        | 1.61        |
| PTPRJ         | protein tyrosine phosphatase, receptor type, J                                   | 1.57        | 2.10        |
| RAB8B         | RAB8B, member RAS oncogene family                                                | 2.78        | 2.91        |
| <b>RAP2A†</b> | <b>RAP2A, member of RAS oncogene family</b>                                      | <b>1.75</b> | <b>1.60</b> |
| RAPGEF6       | Rap guanine nucleotide exchange factor (GEF) 6                                   | 1.63        | 1.77        |
| RBM17         | RNA binding motif protein 17                                                     | 1.82        | 1.50        |
| RNF138        | ring finger protein 138                                                          | 1.67        | 1.61        |
| RNF141        | ring finger protein 141                                                          | 2.68        | 2.20        |
| RPS6KA3       | ribosomal protein S6 kinase, 90kDa, polypeptide 3                                | 1.97        | 2.28        |
| RPS6KB1       | ribosomal protein S6 kinase, 70kDa, polypeptide 1                                | 3.22        | 2.63        |
| RRAS2         | related RAS viral (r-ras) oncogene homolog 2                                     | 6.26        | 5.37        |
| RSPRY1        | ring finger and SPRY domain containing 1                                         | 3.30        | 2.78        |
| RTN4          | reticulon 4                                                                      | 1.59        | 2.07        |
| SCML1         | sex comb on midleg-like 1 (Drosophila)                                           | 3.68        | 2.62        |
| SEC23B        | Sec23 homolog B (S. cerevisiae)                                                  | 7.96        | 5.73        |
| SKP2          | S-phase kinase-associated protein 2 (p45)                                        | 4.54        | 1.75        |
| SLC25A43      | solute carrier family 25, member 43                                              | 3.24        | 2.62        |
| SLC2A14       | solute carrier family 2 (facilitated glucose transporter), member 14             | 2.57        | 1.79        |
| SLC35A1       | solute carrier family 35 (CMP-sialic acid transporter), member A1                | 1.98        | 2.12        |
| SLC38A1       | solute carrier family 38, member 1                                               | 2.38        | 1.74        |
| SLC39A10      | solute carrier family 39 (zinc transporter), member 10                           | 3.87        | 3.55        |
| SLC7A11       | solute carrier family 7, (cationic amino acid transporter, y+ system) member 11  | 2.12        | 1.85        |
| SLC7A6OS      | solute carrier family 7, member 6 opposite strand                                | 1.87        | 2.37        |
| SMN1          | survival of motor neuron 1, telomeric                                            | 2.72        | 2.47        |
| SNRPA1        | small nuclear ribonucleoprotein polypeptide A'                                   | 2.82        | 1.97        |
| SQSTM1        | sequestosome 1                                                                   | 1.82        | 1.85        |
| STAT3         | signal transducer and activator of transcription 3 (acute-phase response factor) | 1.84        | 1.66        |
| SUB1          | SUB1 homolog (S. cerevisiae)                                                     | 1.91        | 1.88        |
| TDG           | thymine-DNA glycosylase                                                          | 3.24        | 2.60        |
| THUMPD1       | THUMP domain containing 1                                                        | 1.99        | 1.89        |
| TOR1B         | torsin family 1, member B (torsin B)                                             | 4.52        | 4.73        |
| TPK1          | thiamin pyrophosphokinase 1                                                      | 2.81        | 2.64        |
| TTC39C        | tetratricopeptide repeat domain 39C                                              | 2.18        | 1.70        |
| UGCG          | UDP-glucose ceramide glucosyltransferase                                         | 2.05        | 2.22        |
| USP53         | ubiquitin specific peptidase 53                                                  | 1.98        | 2.03        |
| VEZT          | vezatin, adherens junctions transmembrane protein                                | 4.00        | 3.62        |
| VMA21         | VMA21 vacuolar H+-ATPase homolog (S. cerevisiae)                                 | 4.63        | 3.35        |
| VTA1          | Vps20-associated 1 homolog (S. cerevisiae)                                       | 1.85        | 1.54        |
| WDR37         | WD repeat domain 37                                                              | 1.99        | 1.78        |
| YPEL5         | yippee-like 5 (Drosophila)                                                       | 1.81        | 1.71        |
| YRDC          | yrdC domain containing (E. coli)                                                 | 3.82        | 2.87        |
| ZCCHC10       | zinc finger, CCHC domain containing 10                                           | 3.14        | 2.21        |
| ZFYVE26       | zinc finger, FYVE domain containing 26                                           | 1.66        | 2.20        |
|               | Full length insert cDNA clone ZB81B12                                            | 3.94        | 3.39        |
|               | Full-length cDNA clone CS0DK008YI09 of HeLa cells Cot 25-                        | 6.82        | 3.88        |

|                                                                             |      |      |
|-----------------------------------------------------------------------------|------|------|
| normalized of Homo sapiens (human)<br>CDNA FLJ30661 fis, clone DFNES2000526 | 4.84 | 2.77 |
| Homo sapiens, clone IMAGE:4294444, mRNA                                     | 1.71 | 1.56 |
| Full-length cDNA clone CS0DF022YM06 of Fetal brain of Homo sapiens (human)  | 1.70 | 1.71 |
| MRNA; cDNA DKFZp586F1523 (from clone DKFZp586F1523)                         | 1.65 | 1.73 |
| CDNA FLJ30010 fis, clone 3NB692000154                                       | 2.26 | 2.83 |

\*: Transcripts downregulated exclusively by miR-376a\*A in both U87 and SW1783 glioma cells (1.5-fold,  $p < 0.05$ ), 24 hours after transfection with miR-376a\*A compared to control miRNA are listed. This list resulted after transcripts identified to be commonly downregulated by miR-376a\*A and miR-376a\*G after similar analysis were excluded (Supplemental Figure 7A).

† RAP2A was selected as candidate target gene of miR-376a\*A based on presence of six miR-376a\*A binding sites in its 3'UTR as predicted by RNA22, conservation of 3'UTR sites in mammals (Supplemental Figure 7B), and Gene Ontology analysis listing 'negative regulation of cell migration' as a biological process regulated by RAP2A.

**Supplemental Table 3. Genes downregulated by miR-376a\*G in U87 and SW1783 cells\***

| Symbol       | Description                                                             | Fold-change in U87 | Fold-change in SW1783 |
|--------------|-------------------------------------------------------------------------|--------------------|-----------------------|
| AASDHPPT     | aminoadipate-semialdehyde dehydrogenase-phosphopantetheinyl transferase | 2.27               | 2.03                  |
| ABHD2        | abhydrolase domain containing 2                                         | 2.50               | 2.10                  |
| ABL1         | c-abl oncogene 1, receptor tyrosine kinase                              | 4.05               | 3.50                  |
| ACVR1        | activin A receptor, type I                                              | 4.85               | 4.42                  |
| AFF1         | AF4/FMR2 family, member 1                                               | 1.71               | 1.58                  |
| AFG3L2       | AFG3 ATPase family gene 3-like 2 (yeast)                                | 1.88               | 1.96                  |
| AHCYL2       | S-adenosylhomocysteine hydrolase-like 2                                 | 1.68               | 1.54                  |
| <b>AMFR†</b> | <b>autocrine motility factor receptor</b>                               | <b>1.9</b>         | <b>1.71</b>           |
| AP3M1        | adaptor-related protein complex 3, mu 1 subunit                         | 3.51               | 2.50                  |
| APC          | adenomatous polyposis coli                                              | 2.16               | 2.03                  |
| ARF1         | ADP-ribosylation factor 1                                               | 2.70               | 2.11                  |
| ARHGAP21     | Rho GTPase activating protein 21                                        | 3.05               | 2.54                  |
| ARHGAP26     | Rho GTPase activating protein 26                                        | 2.17               | 2.21                  |
| ARHGEF7      | Rho guanine nucleotide exchange factor (GEF) 7                          | 1.52               | 1.67                  |
| ARL4C        | ADP-ribosylation factor-like 4C                                         | 1.96               | 1.55                  |
| ARMC8        | armadillo repeat containing 8                                           | 2.23               | 2.37                  |
| ARNTL        | aryl hydrocarbon receptor nuclear translocator-like                     | 2.29               | 1.67                  |
| ARRDC3       | arrestin domain containing 3                                            | 3.02               | 2.44                  |
| BRD3         | bromodomain containing 3                                                | 1.66               | 1.56                  |
| C10orf26     | chromosome 10 open reading frame 26                                     | 3.78               | 2.56                  |
| C13orf23     | chromosome 13 open reading frame 23                                     | 1.97               | 1.76                  |
| C15orf57     | chromosome 15 open reading frame 57                                     | 3.27               | 3.06                  |
| C17orf39     | chromosome 17 open reading frame 39                                     | 1.84               | 1.87                  |
| C17orf80     | chromosome 17 open reading frame 80                                     | 2.15               | 1.72                  |
| C19orf2      | chromosome 19 open reading frame 2                                      | 1.75               | 1.59                  |
| C1orf96      | chromosome 1 open reading frame 96                                      | 1.90               | 1.53                  |
| C2orf64      | chromosome 2 open reading frame 64                                      | 1.77               | 1.90                  |
| C5orf51      | chromosome 5 open reading frame 51                                      | 3.08               | 1.81                  |
| C9orf126     | chromosome 9 open reading frame 126                                     | 2.26               | 1.69                  |
| CASP7        | caspase 7, apoptosis-related cysteine peptidase                         | 1.90               | 2.04                  |
| CBLB         | Cas-Br-M (murine) ecotropic retroviral transforming sequence b          | 1.81               | 1.50                  |
| CDC26        | cell division cycle 26 homolog (S. cerevisiae)                          | 3.21               | 3.01                  |
| CHD6         | chromodomain helicase DNA binding protein 6                             | 1.92               | 1.79                  |
| CYB5R4       | cytochrome b5 reductase 4                                               | 3.79               | 2.52                  |
| DHTKD1       | dehydrogenase E1 and transketolase domain containing 1                  | 2.25               | 1.83                  |
| DPYSL3       | dihydropyrimidinase-like 3                                              | 2.46               | 3.90                  |
| DUSP14       | dual specificity phosphatase 14                                         | 2.01               | 1.77                  |
| EML4         | echinoderm microtubule associated protein like 4                        | 2.04               | 2.16                  |
| EMP2         | epithelial membrane protein 2                                           | 2.55               | 1.62                  |
| EZH1         | enhancer of zeste homolog 1 (Drosophila)                                | 1.88               | 1.60                  |
| FAM120B      | Family with sequence similarity 120B                                    | 3.13               | 2.53                  |
| FAM122B      | family with sequence similarity 122B                                    | 2.95               | 3.91                  |
| FAM171A1     | family with sequence similarity 171, member A1                          | 2.34               | 1.94                  |
| FBXO46       | F-box protein 46                                                        | 1.89               | 1.54                  |
| FNIP2        | folliculin interacting protein 2                                        | 2.71               | 2.45                  |
| FOXJ3        | forkhead box J3                                                         | 1.57               | 1.52                  |
| FZD5         | frizzled homolog 5 (Drosophila)                                         | 2.52               | 2.53                  |
| GAS2L3       | Growth arrest-specific 2 like 3                                         | 2.11               | 1.55                  |
| GDAP1        | ganglioside-induced differentiation-associated protein 1                | 2.11               | 1.94                  |
| GLOD4        | glyoxalase domain containing 4                                          | 2.43               | 2.54                  |
| GPR157       | G protein-coupled receptor 157                                          | 3.50               | 3.04                  |
| GPR180       | G protein-coupled receptor 180                                          | 1.56               | 2.01                  |
| GRK5         | G protein-coupled receptor kinase 5                                     | 1.80               | 2.09                  |

|           |                                                                                                           |      |      |
|-----------|-----------------------------------------------------------------------------------------------------------|------|------|
| HDAC4     | histone deacetylase 4                                                                                     | 4.37 | 2.83 |
| HIPK2     | homeodomain interacting protein kinase 2                                                                  | 2.21 | 1.74 |
| HRSP12    | heat-responsive protein 12                                                                                | 3.13 | 2.47 |
| IL6R      | interleukin 6 receptor                                                                                    | 2.33 | 2.44 |
| IMPA2     | inositol(myo)-1(or 4)-monophosphatase 2                                                                   | 2.40 | 2.26 |
| IRGQ      | immunity-related GTPase family, Q                                                                         | 2.46 | 1.79 |
| IRS1      | insulin receptor substrate 1                                                                              | 1.68 | 1.53 |
| JMJD6     | jumonji domain containing 6                                                                               | 1.96 | 1.68 |
| JOSD1     | Josephin domain containing 1                                                                              | 2.9  | 2.31 |
| KIAA2018  | KIAA2018                                                                                                  | 2.25 | 1.84 |
| KIF1B     | kinesin family member 1B                                                                                  | 2.48 | 2.31 |
| KIRREL    | kin of IRRE like (Drosophila)                                                                             | 4.10 | 3.44 |
| KLF13     | Kruppel-like factor 13                                                                                    | 1.70 | 2.00 |
| LMAN2L    | lectin, mannose-binding 2-like                                                                            | 1.74 | 1.68 |
| LMLN      | leishmanolysin-like (metallopeptidase M8 family)                                                          | 2.5  | 3.96 |
| LOC149832 | hypothetical protein LOC149832                                                                            | 2.10 | 2.11 |
| LPP       | LIM domain containing preferred translocation partner in lipoma                                           | 1.73 | 1.61 |
| LRRC58    | leucine rich repeat containing 58                                                                         | 2.44 | 2.12 |
| MALT1     | mucosa associated lymphoid tissue lymphoma translocation gene 1                                           | 3.08 | 3.17 |
| MAP2K4    | mitogen-activated protein kinase kinase 4                                                                 | 1.63 | 1.53 |
| MCC       | mutated in colorectal cancers                                                                             | 1.93 | 1.66 |
| MED14     | mediator complex subunit 14                                                                               | 2.25 | 1.97 |
| MLXIP     | MLX interacting protein                                                                                   | 2.61 | 1.84 |
| MOBKL1B   | MOB1, Mps One Binder kinase activator-like 1B (yeast)                                                     | 2.35 | 2.06 |
| MYCBP     | c-myc binding protein                                                                                     | 1.98 | 1.95 |
| NAV1      | neuron navigator 1                                                                                        | 3.10 | 2.38 |
| NRN1      | neuritin 1                                                                                                | 2.55 | 1.53 |
| NUCKS1    | nuclear casein kinase and cyclin-dependent kinase substrate 1                                             | 2.32 | 1.79 |
| OXS1      | oxidative-stress responsive 1                                                                             | 1.94 | 2.21 |
| PAFAH1B1  | platelet-activating factor acetylhydrolase, isoform Ib, subunit 1 (45kDa)                                 | 1.81 | 1.61 |
| PDLIM5    | PDZ and LIM domain 5                                                                                      | 1.69 | 1.56 |
| PEG10     | paternally expressed 10                                                                                   | 2.54 | 2.41 |
| PI4K2A    | phosphatidylinositol 4-kinase type 2 alpha                                                                | 1.77 | 1.51 |
| PLS1      | plastin 1 (I isoform)                                                                                     | 4.12 | 3.21 |
| PPFIA1    | protein tyrosine phosphatase, receptor type, f polypeptide (PTPRF), interacting protein (liprin), alpha 1 | 2.18 | 1.87 |
| PRICKLE2  | prickle homolog 2 (Drosophila)                                                                            | 1.84 | 1.55 |
| PRKAB2    | protein kinase, AMP-activated, beta 2 non-catalytic subunit                                               | 1.65 | 1.76 |
| PRKACB    | protein kinase, cAMP-dependent, catalytic, beta                                                           | 2.45 | 2.11 |
| PRNP      | prion protein                                                                                             | 1.83 | 1.66 |
| PRRC1     | proline-rich coiled-coil 1                                                                                | 2.78 | 2.07 |
| PRSS23    | Protease, serine, 23                                                                                      | 1.81 | 1.57 |
| PSEN1     | presenilin 1                                                                                              | 2.27 | 2.18 |
| PTCH1     | patched homolog 1 (Drosophila)                                                                            | 2.45 | 1.94 |
| RAB31     | RAB31, member RAS oncogene family                                                                         | 1.7  | 2.11 |
| RBM23     | RNA binding motif protein 23                                                                              | 2.66 | 2.05 |
| SCLY      | selenocysteine lyase                                                                                      | 3.27 | 1.94 |
| SEC22B    | SEC22 vesicle trafficking protein homolog B (S. cerevisiae)                                               | 2.95 | 2.88 |
| SETBP1    | SET binding protein 1                                                                                     | 1.61 | 1.68 |
| SLC1A1    | solute carrier family 1 (neuronal/epithelial high affinity glutamate transporter, system Xag), member 1   | 2.56 | 1.78 |
| SLC30A6   | solute carrier family 30 (zinc transporter), member 6                                                     | 4.93 | 4.07 |
| SLC38A7   | solute carrier family 38, member 7                                                                        | 3.48 | 2.47 |
| SNX21     | sorting nexin family member 21                                                                            | 2.06 | 2.05 |
| SOCS3     | suppressor of cytokine signaling 3                                                                        | 1.71 | 2.08 |
| ST5       | suppression of tumorigenicity 5                                                                           | 2.41 | 1.69 |
| SYT1      | synaptotagmin I                                                                                           | 2.59 | 2.25 |
| TCF7      | transcription factor 7 (T-cell specific, HMG-box)                                                         | 4.58 | 3.16 |
| TFG       | TRK-fused gene                                                                                            | 1.77 | 1.58 |
| TMEM183A  | transmembrane protein 183A                                                                                | 4.26 | 2.51 |
| TMEM33    | transmembrane protein 33                                                                                  | 3.12 | 2.82 |



|           |                                                              |      |      |
|-----------|--------------------------------------------------------------|------|------|
| TNFRSF10B | tumor necrosis factor receptor superfamily, member 10b       | 2.37 | 2.37 |
| TNFRSF21  | tumor necrosis factor receptor superfamily, member 21        | 2.30 | 1.71 |
| TPRG1L    | tumor protein p63 regulated 1-like                           | 3.59 | 2.42 |
| TRIM69    | tripartite motif-containing 69                               | 2.26 | 1.73 |
| TTC7B     | tetratricopeptide repeat domain 7B                           | 3.06 | 1.94 |
| TWSG1     | twisted gastrulation homolog 1 (Drosophila)                  | 3.21 | 1.52 |
| UBE2I     | Ubiquitin-conjugating enzyme E2I (UBC9 homolog, yeast)       | 3.25 | 3.28 |
| UBE2Z     | ubiquitin-conjugating enzyme E2Z                             | 2.01 | 1.66 |
| UBP1      | upstream binding protein 1 (LBP-1a)                          | 3.23 | 2.21 |
| UFM1      | ubiquitin-fold modifier 1                                    | 1.62 | 1.83 |
| UNC13B    | unc-13 homolog B (C. elegans)                                | 1.86 | 1.65 |
| WAPAL     | wings apart-like homolog (Drosophila)                        | 2.28 | 2.10 |
| WBP4      | WW domain binding protein 4 (formin binding protein 21)      | 1.63 | 1.75 |
| XPNPEP3   | X-prolyl aminopeptidase (aminopeptidase P) 3, putative       | 1.64 | 2.21 |
| YIPF6     | Yip1 domain family, member 6                                 | 2.75 | 2.75 |
| ZAK       | sterile alpha motif and leucine zipper containing kinase AZK | 1.78 | 1.82 |
| ZCCHC24   | zinc finger, CCHC domain containing 24                       | 1.79 | 2.19 |
| ZDHHC5    | zinc finger, DHHC-type containing 5                          | 2.56 | 1.98 |
| ZNF23     | zinc finger protein 23 (KOX 16)                              | 2.00 | 2.10 |
| ZNF271    | zinc finger protein 271                                      | 1.86 | 2.5  |
| ZNF317    | zinc finger protein 317                                      | 2.57 | 1.75 |
| ZNF35     | zinc finger protein 35                                       | 2.87 | 1.75 |
| ZXDB      | zinc finger, X-linked, duplicated B                          | 1.81 | 1.88 |
|           | CDNA FLJ30652 fis, clone DFNES2000011                        | 2.10 | 1.87 |
|           | CDNA FLJ39585 fis, clone SKMUS2006633                        | 2.54 | 1.79 |
|           | CDNA FLJ31233 fis, clone KIDNE2004579                        | 1.57 | 1.62 |
|           | CDNA FLJ37302 fis, clone BRAMY2016009                        | 1.85 | 1.78 |
|           | CDNA FLJ34250 fis, clone FCBBF4000529                        | 2.23 | 1.54 |

\* Transcripts downregulated exclusively by miR-376a\*G in both U87 and SW1783 glioma cells (1.5-fold,  $p < 0.05$ ), 24 hours after transfection with miR-376a\*G compared to control miRNA are listed. This list resulted after transcripts identified to be commonly downregulated by miR-376a\*A and miR-376a\*G after similar analysis were excluded (Supplemental Figure 7A).

† AMFR was selected as a candidate target gene of miR-376a\*G/I based on the prediction of two miR-376a\*G binding sites in its 3'UTR and absence of predicted target sites for miR-376a\*A, conservation of target sites in mammals (Supplemental Figure 7C) and its known function as a specific receptor for autocrine motility factor (AMF), a tumor motility-stimulating protein secreted by tumor cells.
